# Supplementary material for: Anhydrobiosis and Freezing-Tolerance: Adaptations That Facilitate the Establishment of Panagrolaimus Nematodes in Polar Habitats
Source: PLoS One. 2015 Mar 6;10(3):e0116084. doi: 10.1371/journal.pone.0116084 (PMC4352009; doi:10.1371/journal.pone.0116084)
Supplement: S1 Table — (DOCX) [file pone.0116084.s008.docx]

**Table S1**. Source of the *Panagrolaimus* isolates used in this study. The names of newly isolated strain are indicated in bold underlined font.

**Species and Strain Geographical Location Habitat Source Reproduction**

*Panagrolaimus* *davidi* (CB1) Ross Island McMurdo Sound, Moss and algae1 Prof. David Wharton Parthenogenetic

Antartica1

*Panagrolaimus paetzoldi* Paulina saltmarsh, Westerscheldt Decomposing cordgrass (*Spartina anglica*) 2 Dr. Ilse De Mesel Male/female3

Estuary, Netherlands2

*Panagrolaimus* *rigidus* (AF36) Fayette County, Soil CGC5 Male/female

Pennsylvania, USA4 (isolated by Prof. Andras Fodor)

*Panagrolaimus superbus* (DF5050)Surtsey Island, Iceland6 Gull’s nest in a lava cavity. Prof. Bjorn Sohlenius Male/female

(Nest primarily made from moss

*Rhacomitrium* sp.)6

***Panagrolaimus* sp. AS01** Leixlip, Co. Kildare, Ireland A roof gutter Dr. Adam Shannon Male/female

***Panagrolaimus* sp. AS03** Maynooth, Co. Kildare, Ireland Roof moss (*Bryum capillare* Hedw) Dr. Adam Shannon Male/female

*Panagrolaimus* sp. JB115 Forest Falls, San Bernadino Pine forest soil7 Prof Steven Nadler Parthenogenetic3 County, California7 (isolated by Doug Edelman)

*Panagrolaimus* sp. JB051 Diourbel, central Senegal7 Soil Prof Steven Nadler Parthenogenetic3

(isolated by Dr. Pierre Baujard)

*Panagrolaimus* sp. JU765 Yangshuo, Guangxi, China8 Soil at edge of rice paddy Isolated by Dr. M.-A. Félix Hermaphrodite8

***Panagrolaimus* sp. JU1361** Periyar Natural Preserve, A rotting orange-colored fruit Isolated by Dr. M.-A. Félix Male/female8

Kerala, India8

***Panagrolaimus* sp. JU1365** Between Periyar and Madurai, A rotting Okra pod Isolated by Dr. M.-A. Félix Male/female8

Tamil Nadu, India8

***Panagrolaimus* sp. JU1366** Between Madurai and Tanjore, A rotting cactus stem Isolated by Dr. M.-A. Félix Male/female8

Tamil Nadu, India8

***Panagrolaimus* sp. JU1367** Between Madurai and Tanjore, Soil Isolated by Dr. M.-A. Félix Male/female8

Tamil Nadu, India8

***Panagrolaimus* sp. JU1369** Cuddatore, Tamil Nadu, India8 A mix of rotting fruits, soil and coconut debris Isolated by Dr. M.-A. Félix Male/female8

***Panagrolaimus* sp. JU1371** Government Place, Pondicherry, Soil and leaf litter Isolated by Dr. M.-A. Félix Male/female8

India8

***Panagrolaimus* sp. JU1387** La Réunion, Indian Ocean8 Rotting velvet apples (*Diospyros philippensis*) Isolated by Dr. M.-A. Félix Male/female8

***Panagrolaimus* sp. JU1645** Between Matinho and Caibros Rotting agave leaves Isolated by Dr. M.-A. Félix Male/female8

on Santo Antao Island,

Cape Verde8

***Panagrolaimus* sp. JU1646** Ribeira Cumba Small rotting fruits Isolated by Dr. M.-A. Félix Male/female8

Santiago Island, Cape Verde8

*Panagrolaimus* sp. PS443 Byurakan, Armenia9 Soil CGC Male/female

(isolated by Raffi Aroian)

*Panagrolaimus* sp. PS1159North Carolina, USA Soil CGC Parthenogenetic3

(isolated by J. Millar)

*Panagrolaimus* sp. PS1579 Huntington Botanical Gardens Soil CGC Parthenogenetic

San Marino, California, USA(isolated by Dr. M.-A. Félix)

*Panagrolaimus* sp. PS5056 Phnom Phen, Cambodia10 John DeModena Male/female

***Panagrolaimus* sp. PS6470** Galileo Hill, Mid Mojave Desert, Soil Isolated by John DeModena Male/female

Kern County, California10

*Panagrolaimus* sp. SN103 Eagle Lake Field Station11 Tree stump with frass and fungus11 Prof Steven Nadler Parthenogenetic3

Lassen County, California

- - - 1. Wharton, D.A and Browne, I. M. (1989). A survey of terrestrial nematodes from the McMurdo Sound region, Antarctica. NZ J. Zool. 16, 629-641.
      2. De Mesel. I., Derycke, S., Swings, J., Vincx, M. and Moens, T. (2003). Influence of bacterivorous nematodes on the decomposition of cordgrass. J Exp. Mar. Biol. Ecol. 296, 227-242.
      3. Lewis S.C., Dyal L.A., Hilburn C.F., Weitz S., Liau W.S., LaMunyon C.W., Denver D.R. 2009 Molecular evolution in *Panagrolaimus* nematodes*:* origins of parthenogenesis, hermaphroditism and the Antarctic species *P. davidi*. *BMC Evol Biol* 9, Artn 15. (doi:10.1186/1471-2148-9-15).
      4. Prof. Andras Fodor, Department of Entomology, Ohio State University, OARDC, Wooster, OH, personal communication.
      5. Caenorhabditis Genetics Center, University of Minnesota, Minneapolis, MN 55455, USA.
      6. Bostrom, S. (1998). Descriptions and morphological variability of three populations of *Panagrolaimus* Fuch 1930 (Nematoda: Panagrolaimidae). *Nematologica* 34, 144-155.
      7. Dr. Manuel Mundo-Ocampo, Department of Nematology, University of California Riverside, personal communication
      8. The Félix Laboratory Strain Database, http://www.justbio.com/worms/.
      9. Aroian, R. V., Carta, L., Kaloshian, I. and Sternberg, P. W. (1993). A free-living *Panagrolaimus* sp. from Armenia can survive in anhydrobiosis for 8.7 years. *J. Nematol.* 25, 500-502.
      10. John DeModena, Sternberg Lab., Division of Biology 156-29, California Institute of Biology, Pasadena, Ca 91125, USA, personal commumication.
      11. Prof. Steven Nadler, Department of Nematology, University of California Davis, personal communication.
